# Supplementary material for: Lenvatinib-Loaded Poly(lactic-co-glycolic acid) Nanoparticles with Epidermal Growth Factor Receptor Antibody Conjugation as a Preclinical Approach to Therapeutically Improve Thyroid Cancer with Aggressive Behavior
Source: MDPI journal article supplement (doi:10.3390/biom13111647), 2023-11-13
Supplement: s1 [file s1]

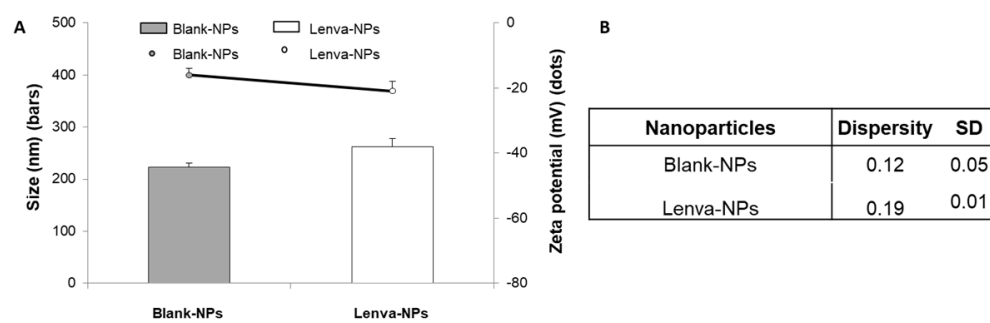

**Figure S1.** Physicochemical characterization of blank-NPs and lenva-NPs. (A) Size (bars), and zeta potential (dots), (B) Dispersity index and standard deviation values of blank-NPs and lenva-NPs. Each value represents the mean  $\pm$  standard deviation of three measurements.

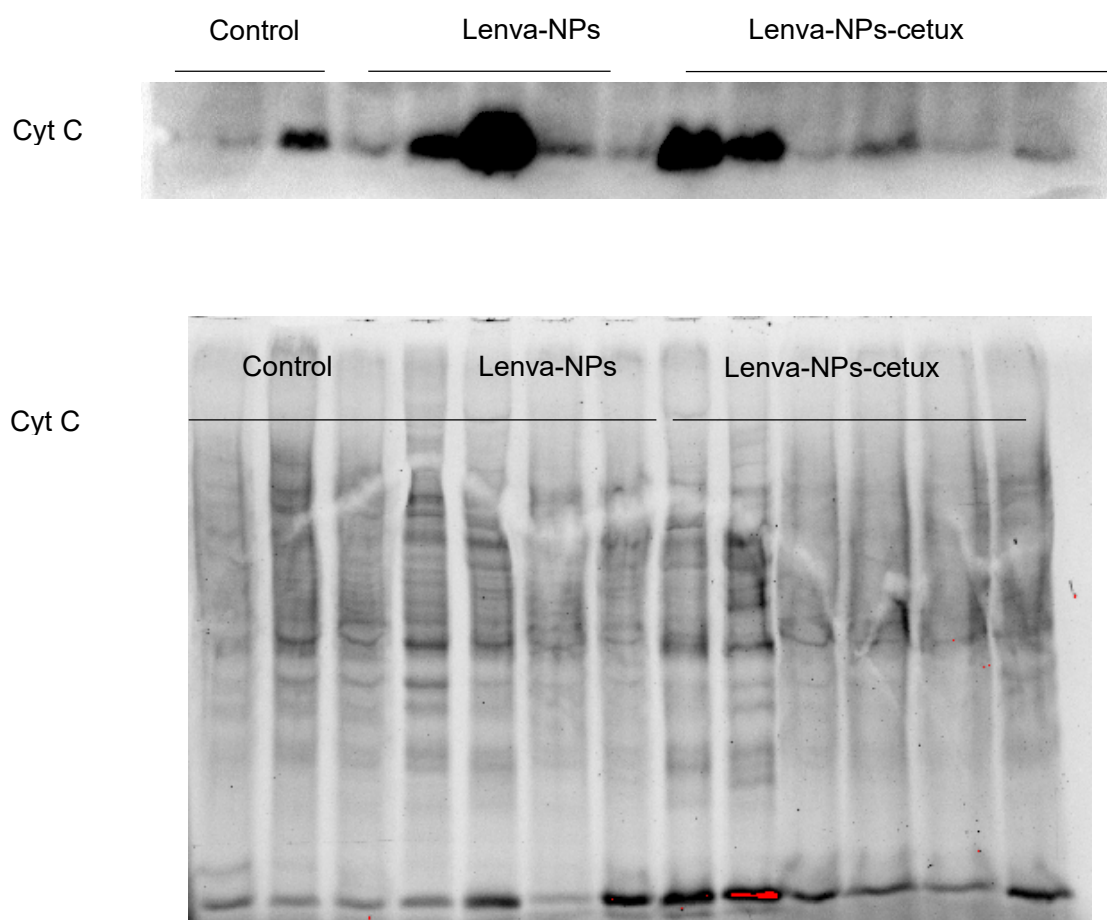

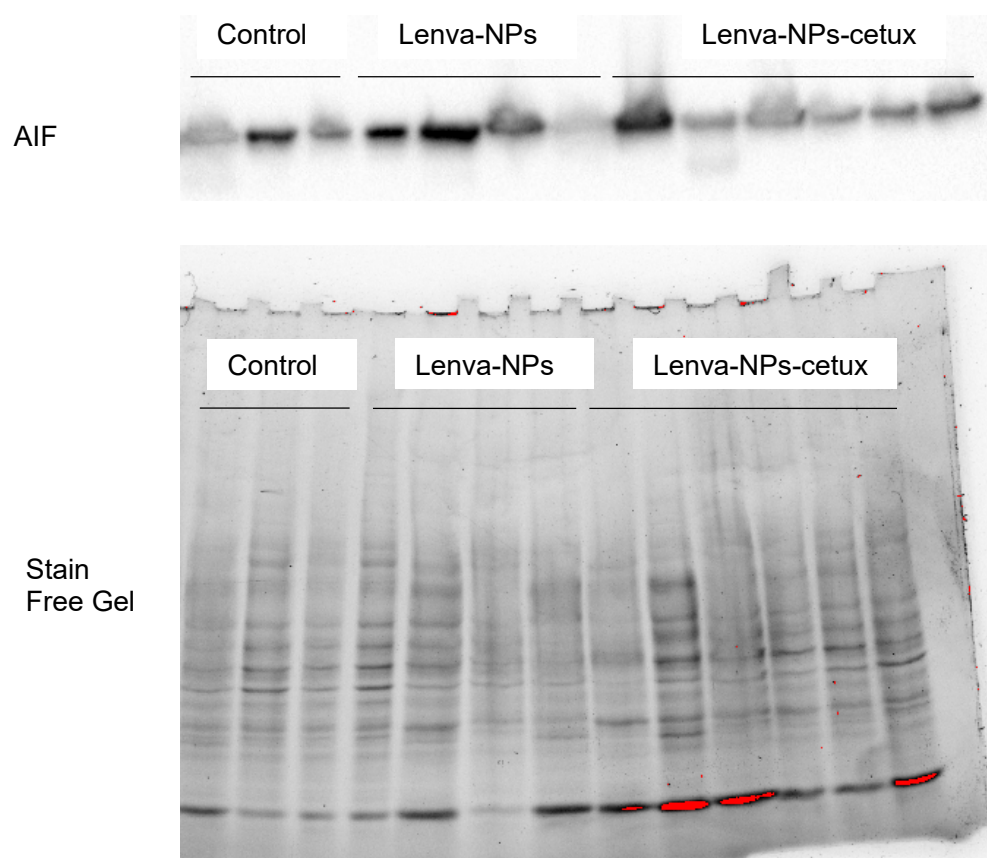

**Figure S2.** Original Western Blots of apoptosis markers (Cyt C and AIF) of Figure 10.
